# Supplementary material for: A plasmid toolkit for cloning chimeric cDNAs encoding customized fusion proteins into any Gateway destination expression vector
Source: PubMed Central journal article supplement (PMC3765358; doi:10.1186/1471-2199-14-18), 2013-08-20

**A**

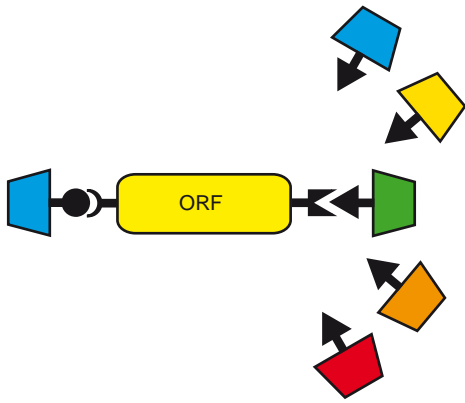

**B**

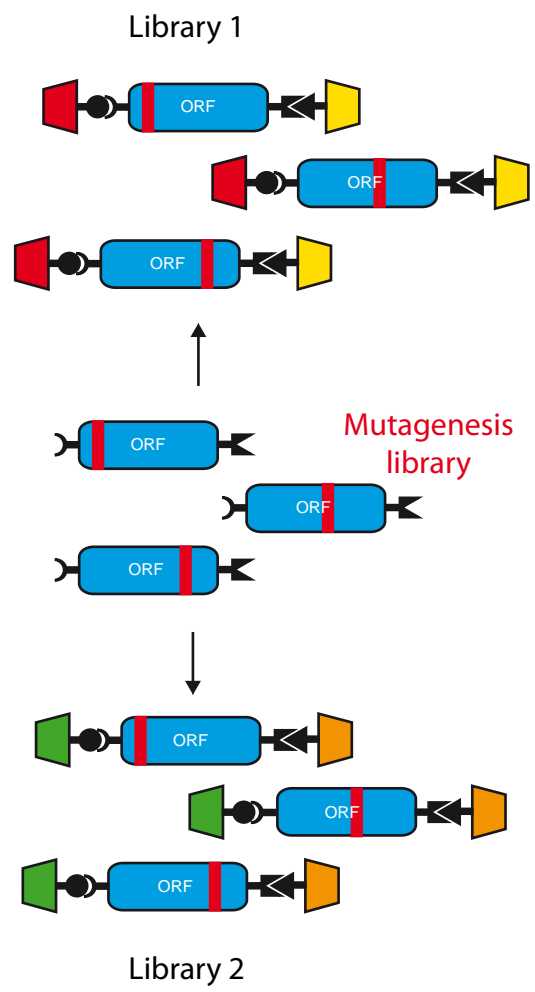

**C**

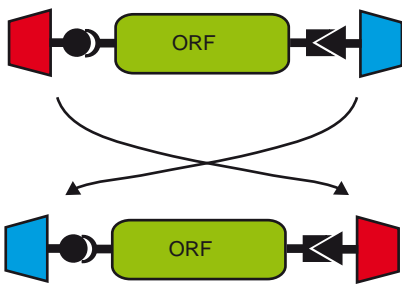

Supplement: 1471-2199-14-18-S4.pdf [file 1471-2199-14-18-S4.pdf]
